# Supplementary material for: The Antiviral Compound PSP Inhibits HIV-1 Entry via PKR-Dependent Activation in Monocytic Cells
Source: MDPI journal article supplement (doi:10.3390/v15030804), 2023-03-22
Supplement: s1 [file s1]

A.

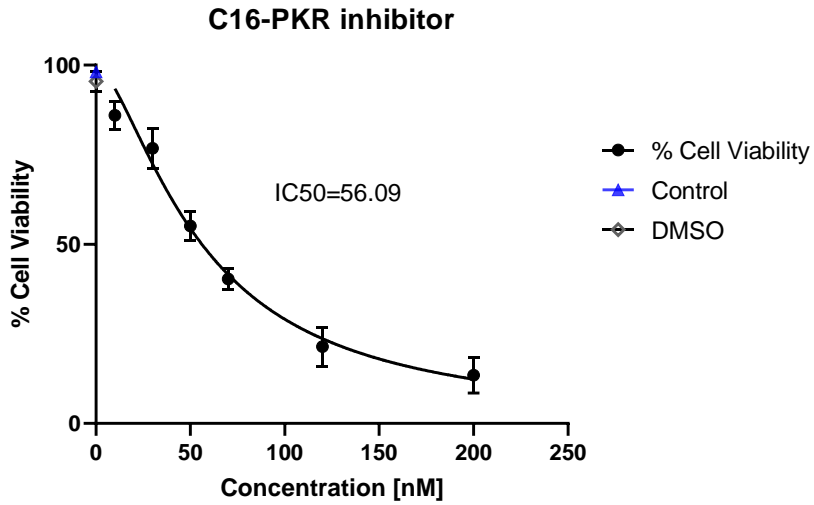

B.

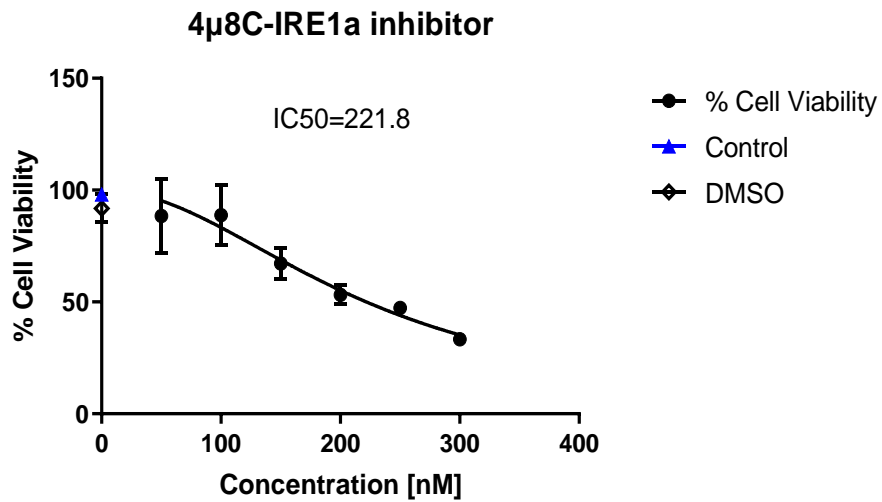

**Figure S1.** MTT assays for detection of IC<sub>50</sub> of pharmacological drugs used. The concentration that induced 50% cell viability in THP1 cells were determined for (A). C16 (IC<sub>50</sub> = 56.09nM) and (B) 4 $\mu$ 8C (IC<sub>50</sub> = 221.8nM). Experiments were carried out in biological triplicates,  $n=3$ .

**Figure S2:** Full, original, uncropped, representative western blot images within manuscript

**Western blot photos found in Figure 4:**

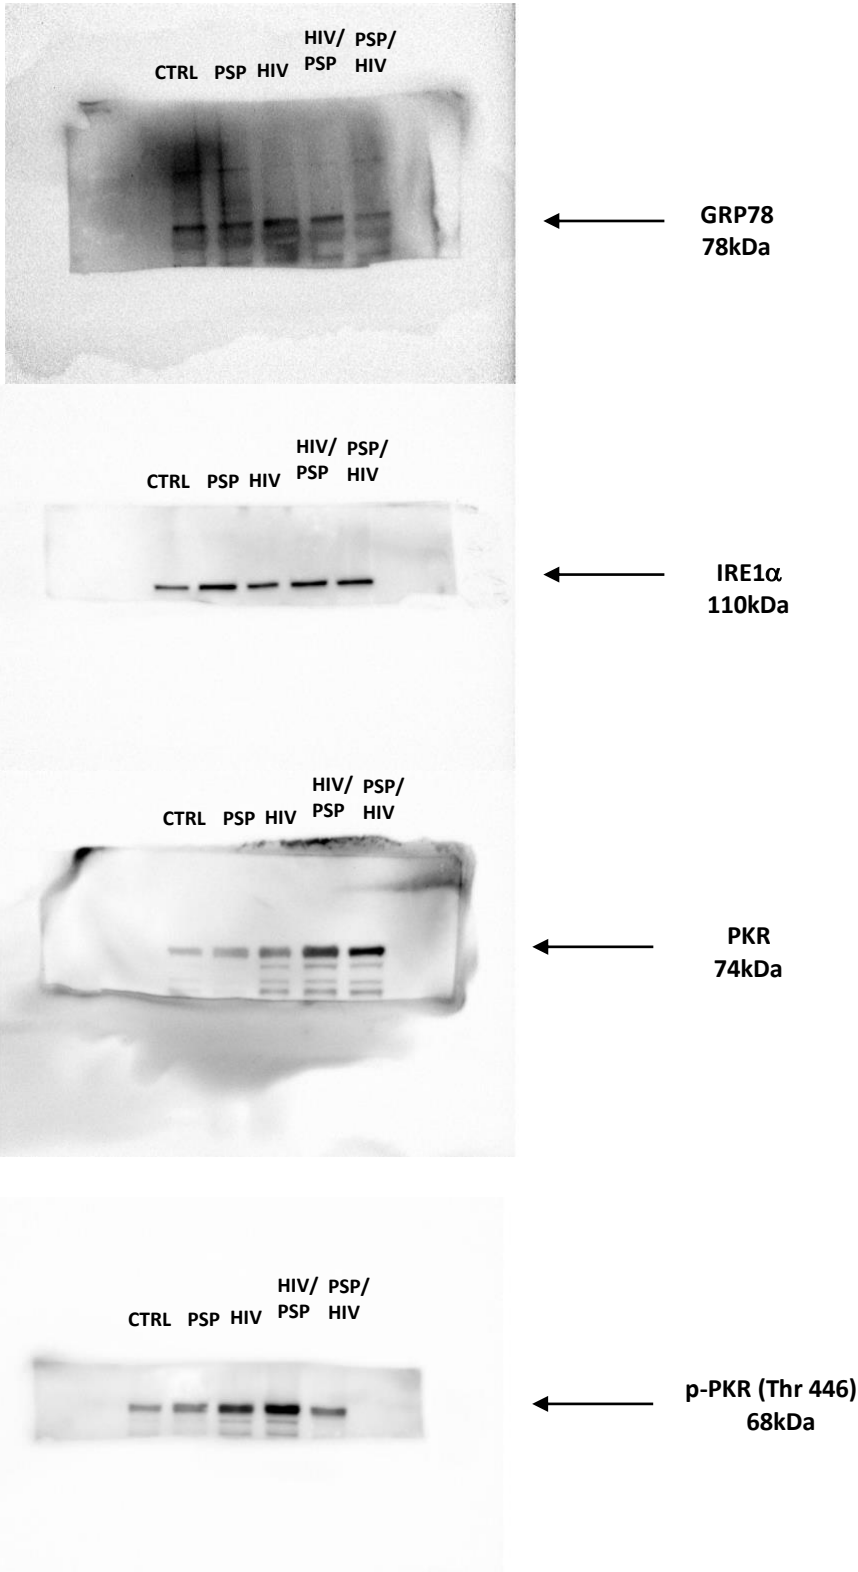

Original representative image of Cofilin1 found within manuscript.

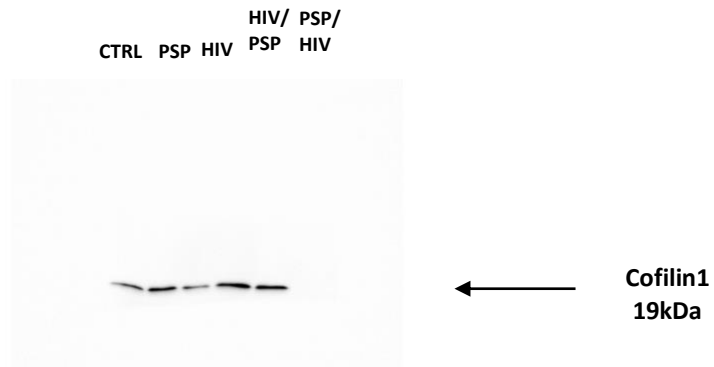

Same photo with contrast adjusted using Bio-Rad Image Lab software:

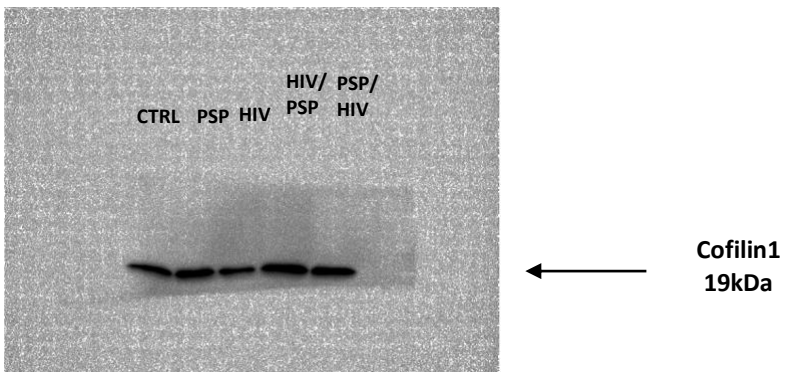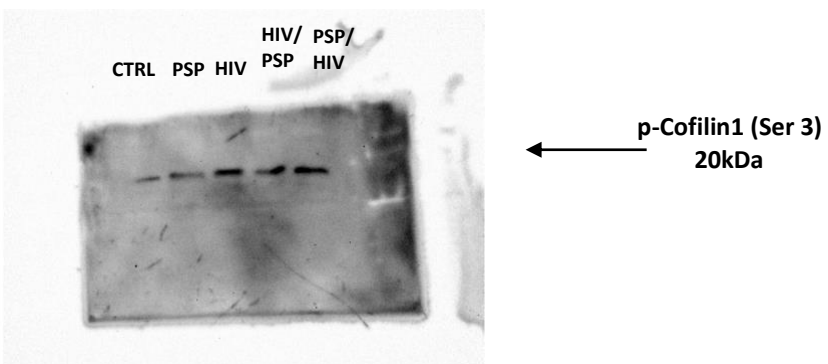

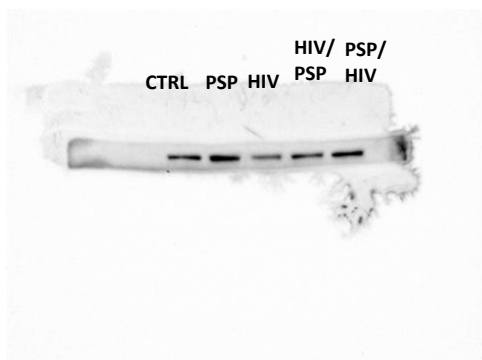

Gelsolin  
83kDa

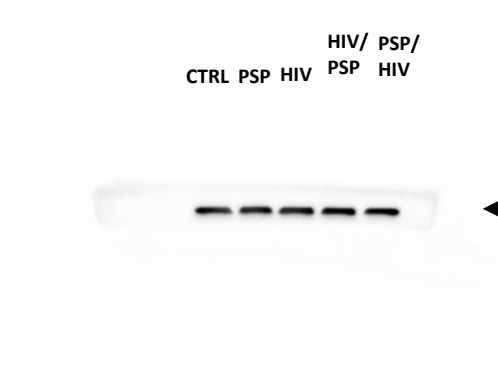

$\beta$ -Actin (Loading Control)  
42kDa

Western blot photos found in Figure 5:

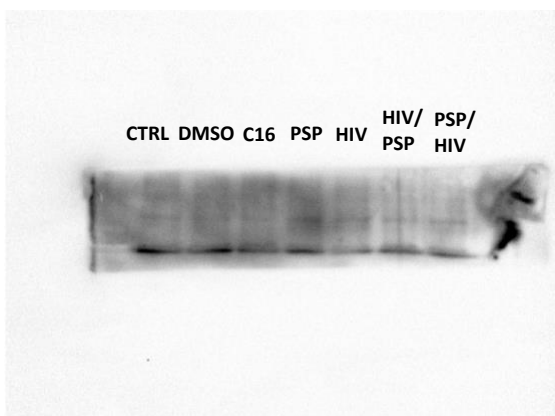

p-Cofilin1 (Ser 3)  
20kDa

Original representative image for Cofilin1 found within manuscript:

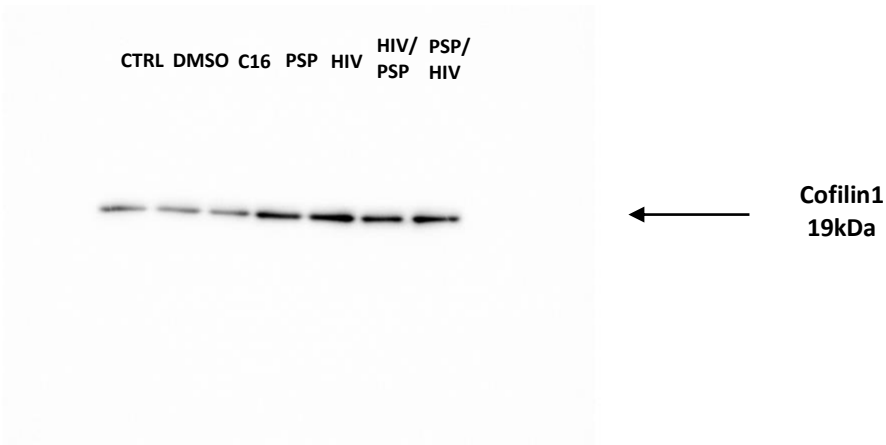

Same photo with contrast adjusted using Bio-Rad Image Lab software:

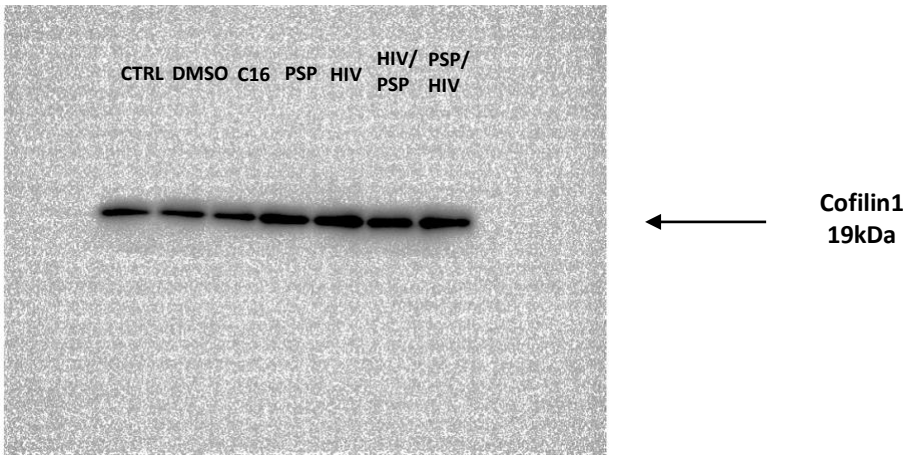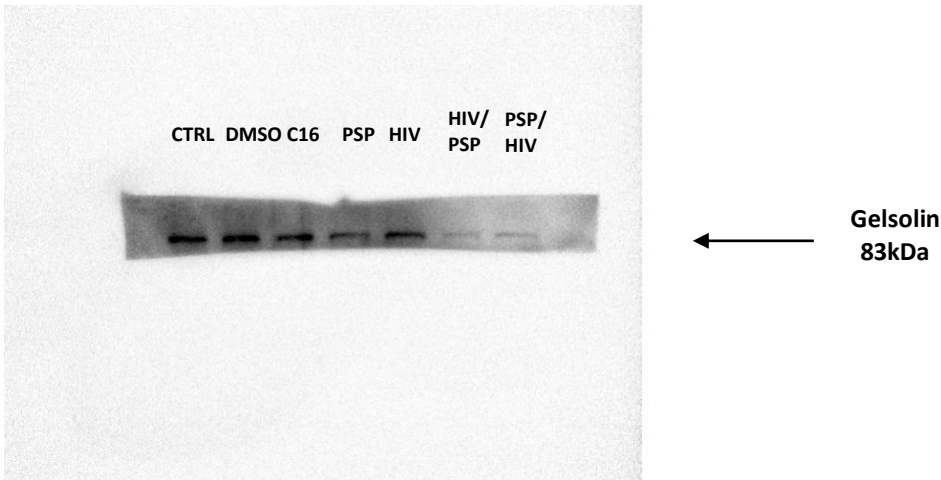

Original representative image of p-PKR found within manuscript:

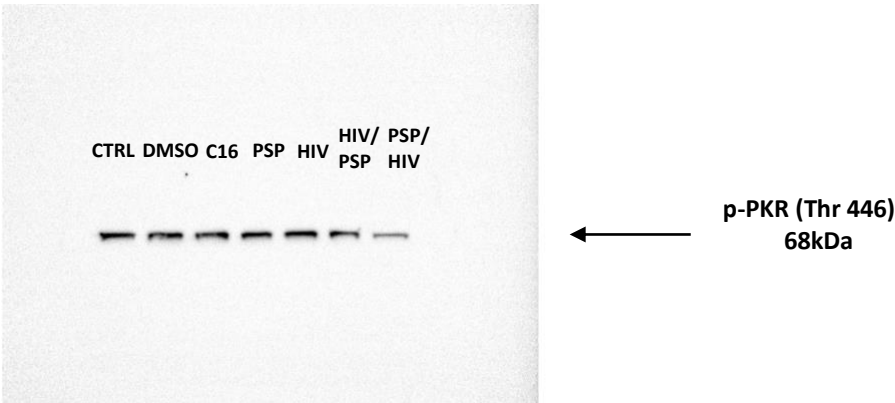

Same photo with contrast adjusted using Bio-Rad Image Lab software:

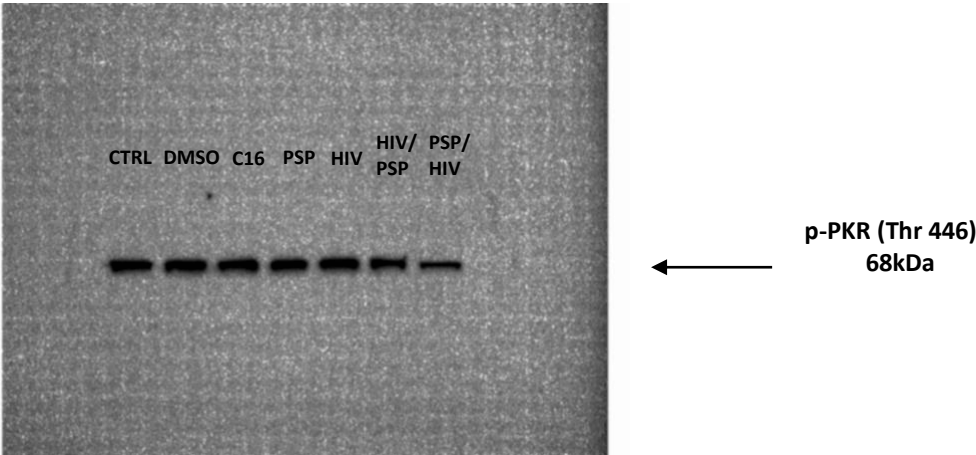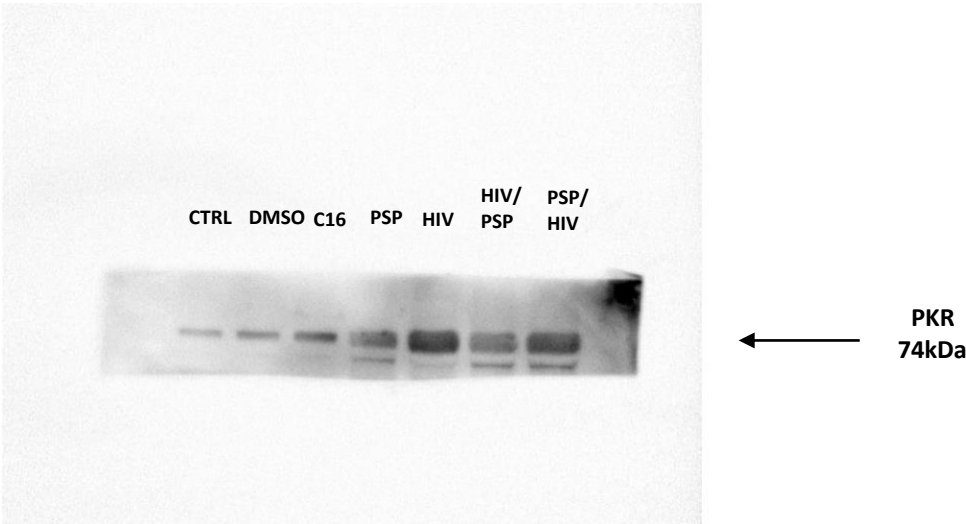

Original representative image of loading control found in manuscript:

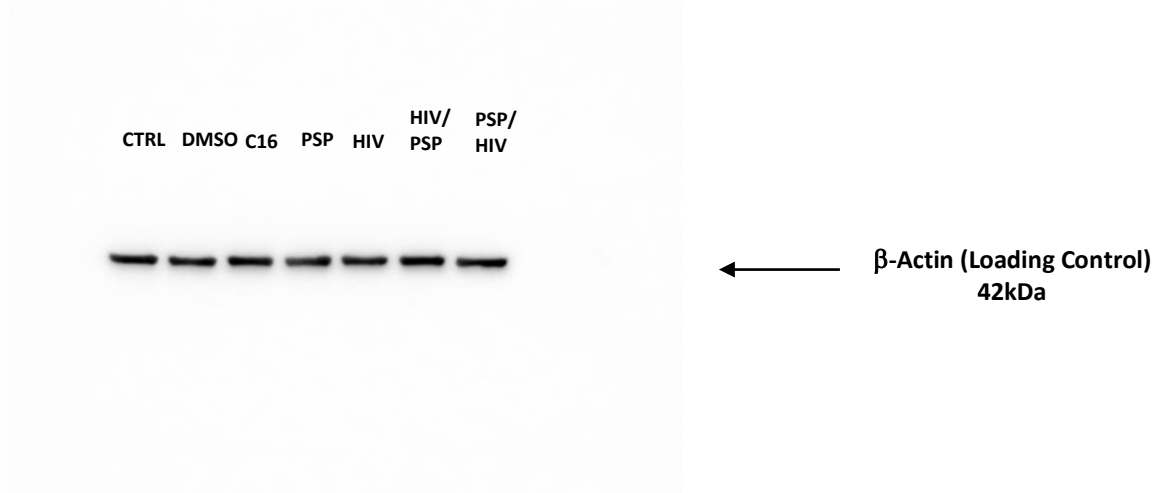

Same photo with contrast adjusted using Bio-Rad Image Lab software

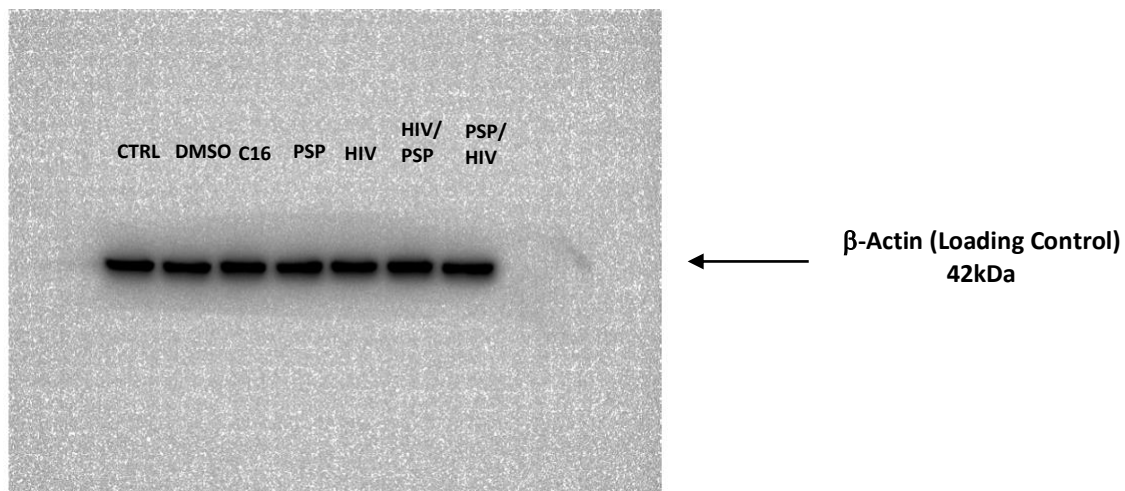

**Western blot photos found in Figure 6:**

Original representative image of p-Cofilin1 found in manuscript:

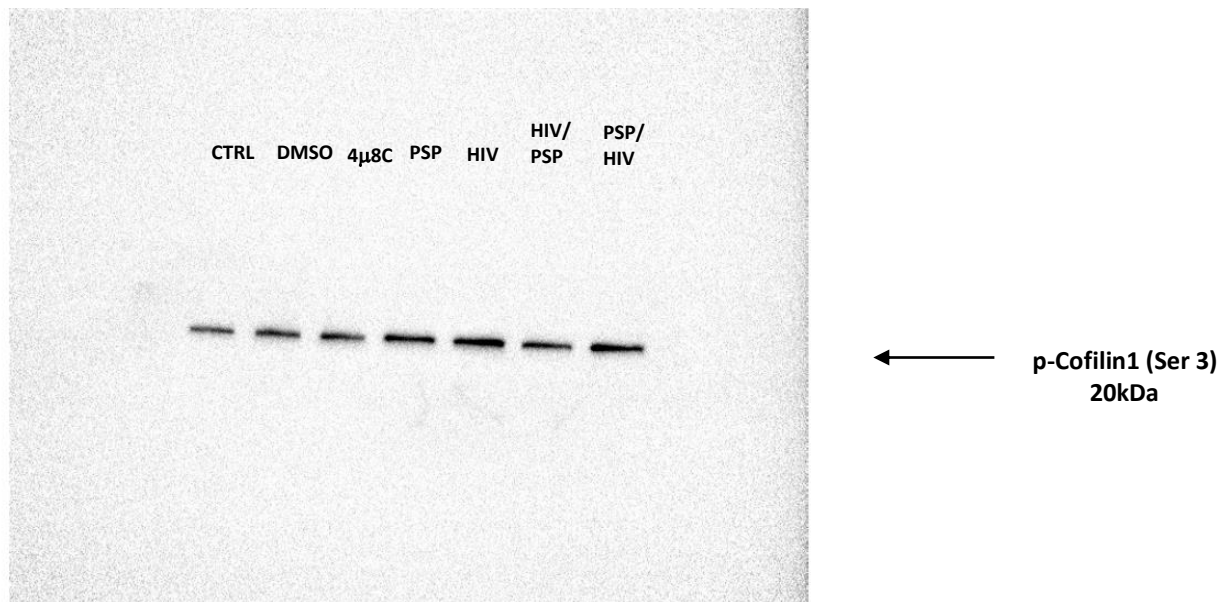

Same photo with contrast adjusted using Bio-Rad Image Lab software

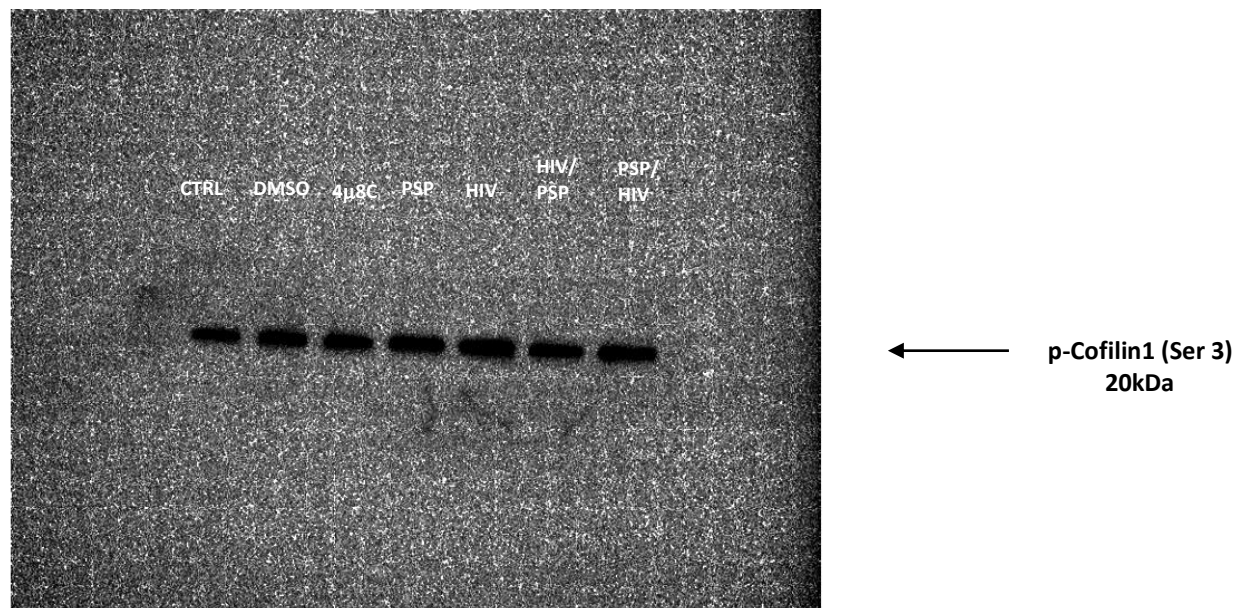



Original representative image of Cofilin1 found in manuscript:

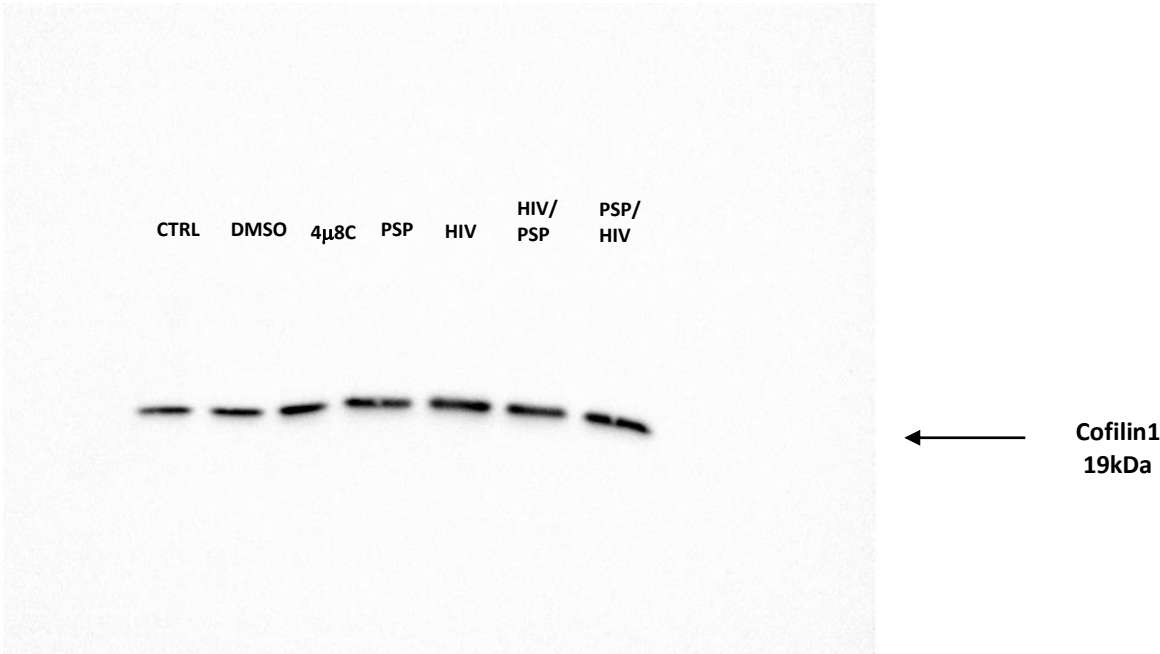

Same photo with contrast adjusted using Bio-Rad Image Lab software

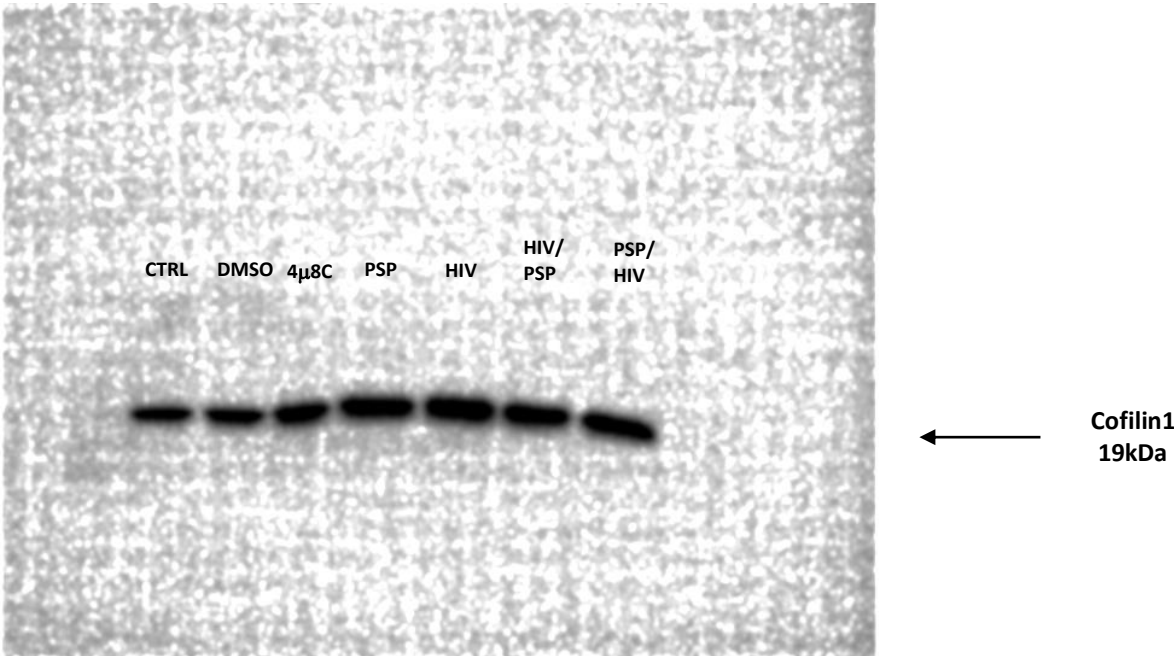

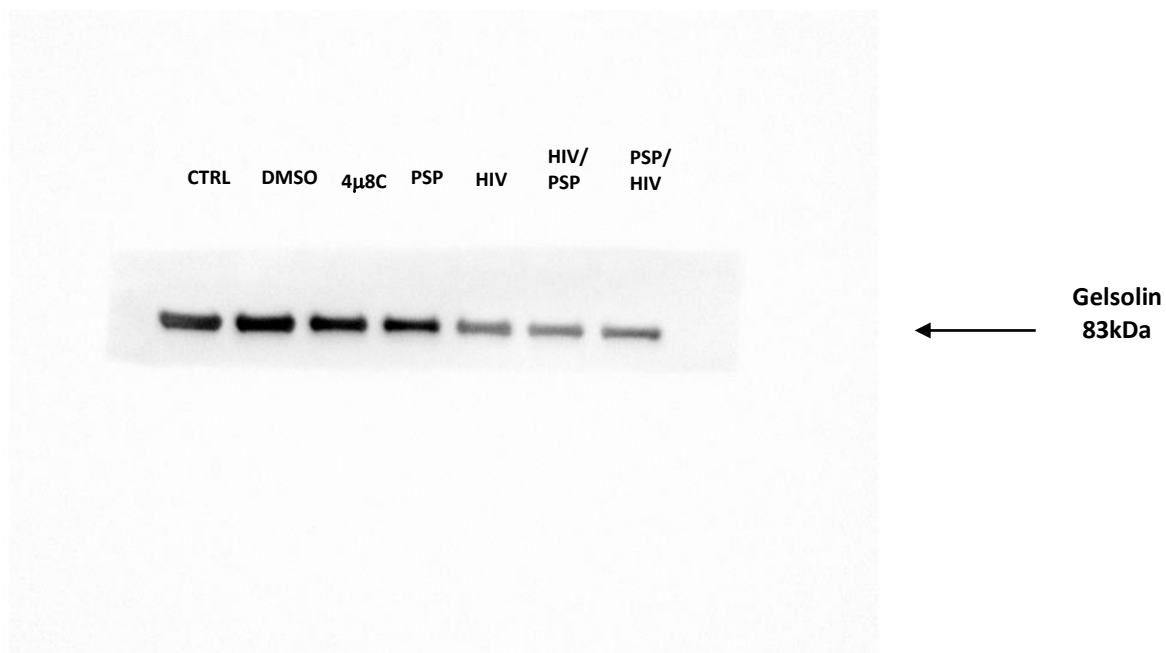

Original representative image of p-PKR found in manuscript:

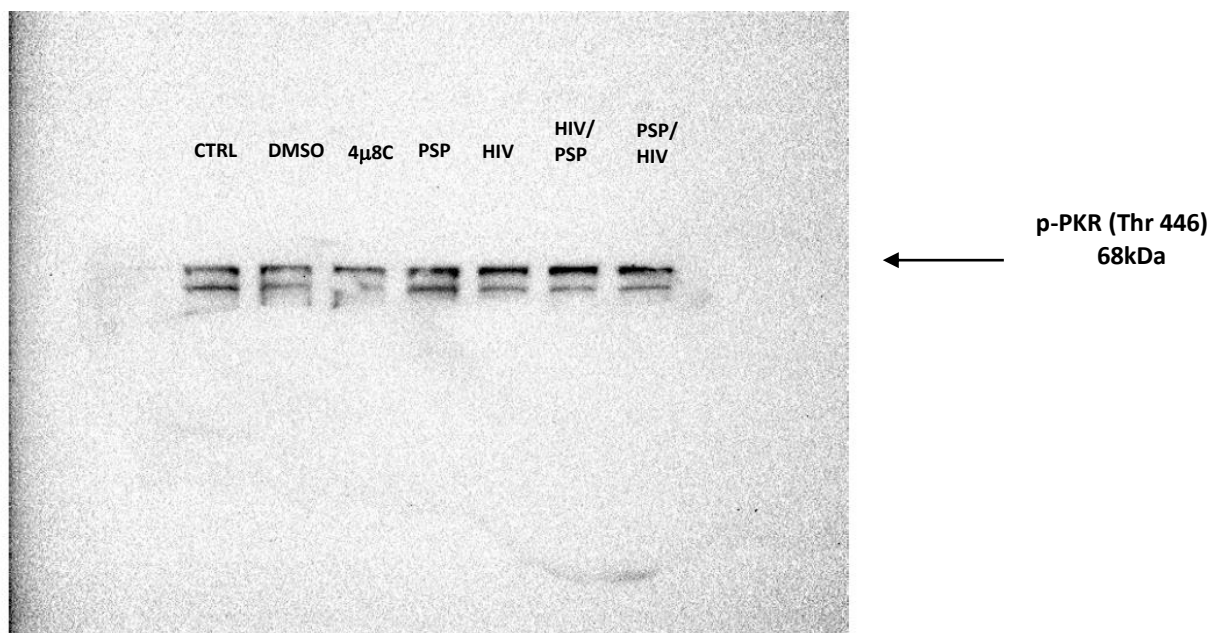

Same photo with contrast adjusted using Bio-Rad Image Lab software

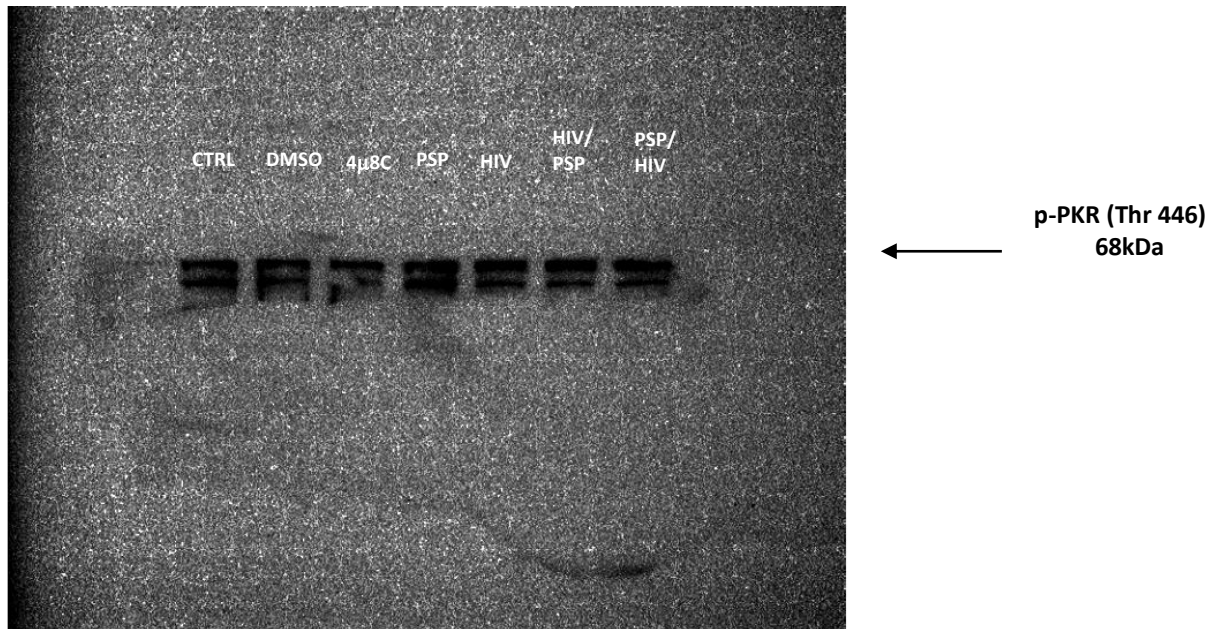

Original representative image of PKR found in manuscript:

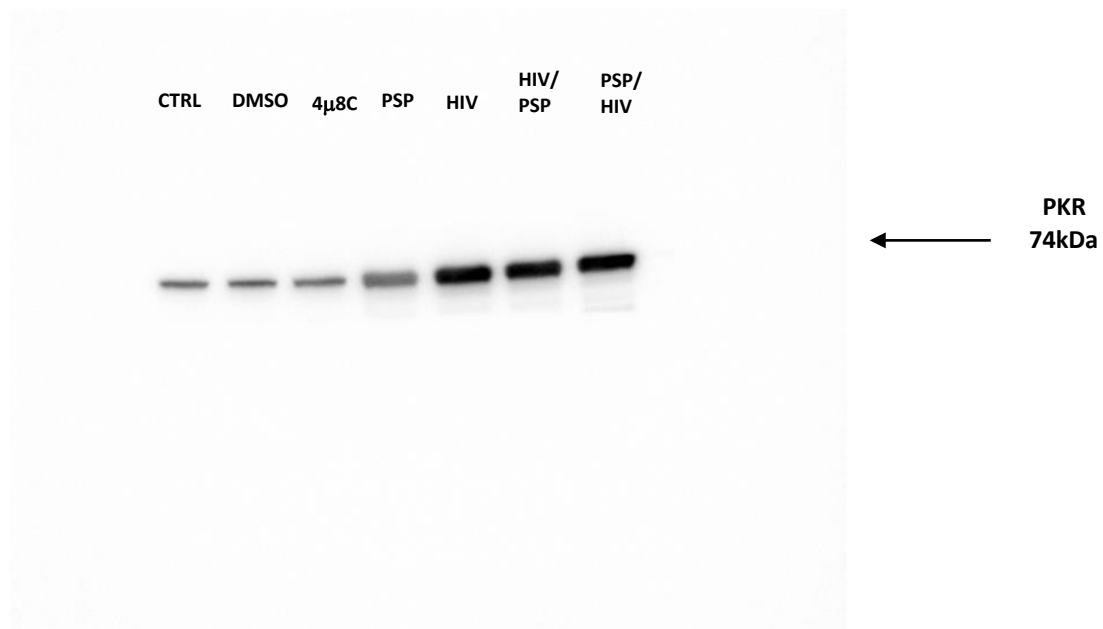

Same photo with contrast adjusted using Bio-Rad Image Lab software

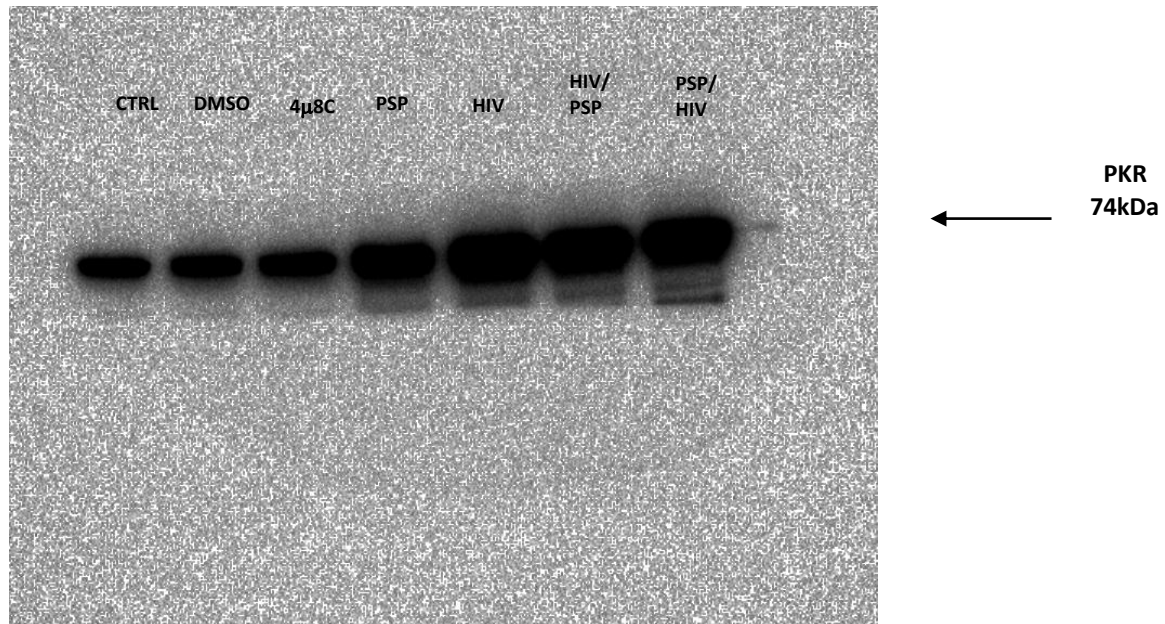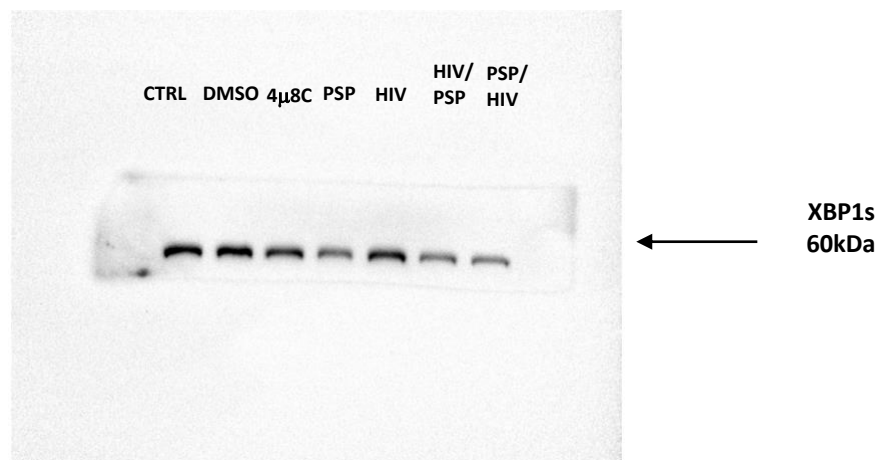

Original representative image of loading control found in manuscript:

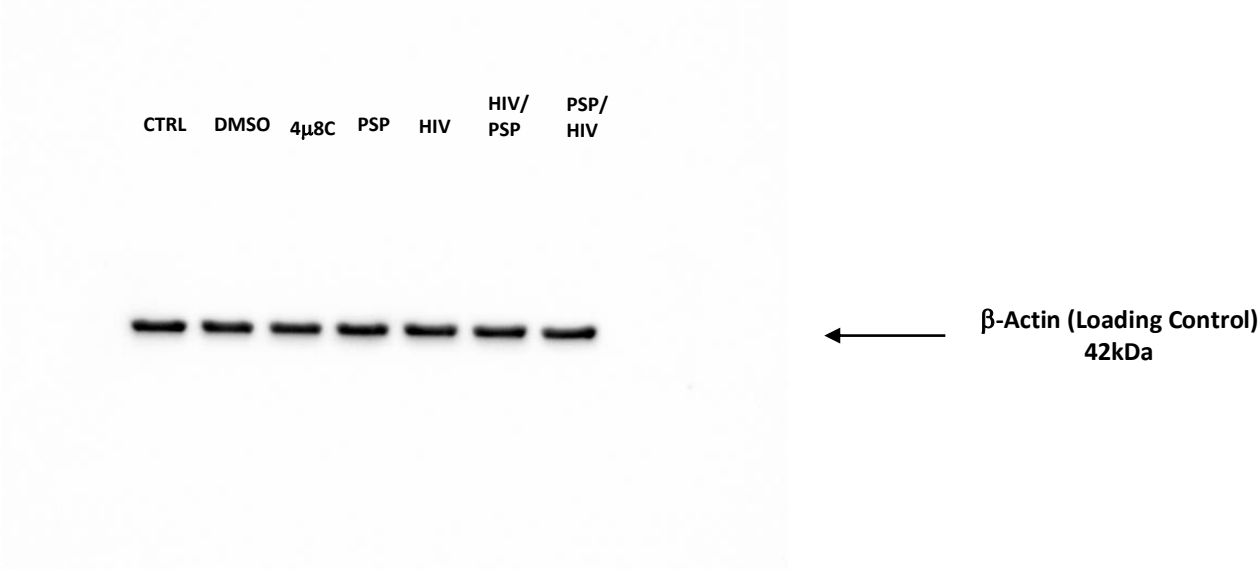

Same photo with contrast adjusted using Bio-Rad Image Lab software

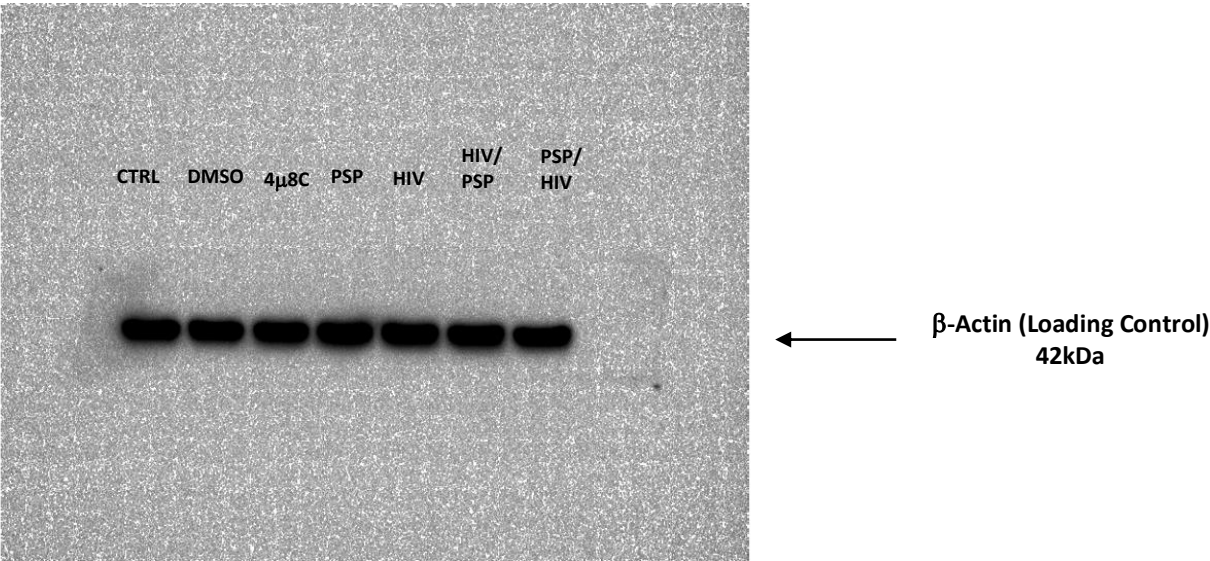

**Table S1.** Differentially expressed cytoskeletal-related proteins identified in PSP treated THP1-Blue-CD14 cells.

| Accession # | GENE    | Quantified Spectra Counts | Protein Name                                                                    | Average Expression in Control | Average Expression in PSP | Fold Change | Adjusted P Value |
|-------------|---------|---------------------------|---------------------------------------------------------------------------------|-------------------------------|---------------------------|-------------|------------------|
| Q9NRX4      | PHPT1   | 15                        | 14 kDa phosphohistidine phosphatase                                             | 18.18                         | 15.15                     | -1.20       | 0.0131           |
| P12814      | ACTN1   | 102                       | Alpha-actinin-1                                                                 | 18.19                         | 15.15                     | -1.20       | 0.0005           |
| Q7Z5R6      | APBB1IP | 25                        | Amyloid beta A4 precursor protein-binding family B member 1-interacting protein | 18.91                         | 14.42                     | -1.31       | <0.0001          |
| P08133      | ANXA6   | 96                        | Annexin A6                                                                      | 14.40                         | 18.94                     | 1.32        | <0.0001          |
| P02649      | APOE    | 5                         | Apolipoprotein E                                                                | 13.64                         | 19.70                     | 1.44        | 0.0083           |
| P10415      | BCL2    | 5                         | Apoptosis regulator Bcl-2                                                       | 20.07                         | 13.26                     | -1.51       | 0.0462           |
| Q15121      | PEA15   | 4                         | Astrocytic phosphoprotein PEA-15                                                | 13.87                         | 19.47                     | 1.40        | <0.0001          |
| P07384      | CAPN1   | 79                        | Calpain-1 catalytic subunit                                                     | 18.31                         | 15.02                     | -1.22       | <0.0001          |
| Q99439      | CNN2    | 20                        | Calponin-2                                                                      | 18.51                         | 14.83                     | -1.25       | 0.0134           |
| P48509      | CD151   | 3                         | CD151 antigen                                                                   | 15.12                         | 18.21                     | 1.20        | 0.0007           |
| Q9Y5K6      | CD2AP   | 37                        | CD2-associated protein                                                          | 18.75                         | 14.58                     | -1.29       | 0.0003           |
| P16070      | CD44    | 9                         | CD44 antigen                                                                    | 12.32                         | 21.01                     | 1.71        | 0.0001           |
| Q9NPY3      | CD93    | 10                        | Complement component C1q receptor                                               | 11.69                         | 21.64                     | 1.85        | <0.0001          |
| O75956      | CDK2AP2 | 2                         | Cyclin-dependent kinase 2-associated protein 2                                  | 18.49                         | 14.85                     | -1.25       | 0.0454           |
| Q5M775      | SPECC1  | 23                        | Cytospin-B                                                                      | 18.77                         | 14.56                     | -1.29       | 0.0002           |
| Q16555      | DPYSL2  | 31                        | Dihydropyrimidine-nase-related protein 2                                        | 13.30                         | 20.04                     | 1.51        | <0.0001          |
| Q9NQ86      | TRIM36  | 18                        | E3 ubiquitin-protein ligase                                                     | 14.09                         | 19.24                     | 1.37        | 0.0049           |
| P98172      | EFNB1   | 2                         | Ephrin-B1                                                                       | 21.50                         | 11.83                     | -1.82       | <0.0001          |
| Q16658      | FSCN1   | 79                        | Fascin                                                                          | 14.46                         | 18.87                     | 1.31        | <0.0001          |

|               |         |     |                                                                                 |       |       |       |         |
|---------------|---------|-----|---------------------------------------------------------------------------------|-------|-------|-------|---------|
| <b>Q0JRZ9</b> | FCHO2   | 24  | FCH domain only<br>protein 2                                                    | 18.62 | 14.71 | -1.27 | 0.0037  |
| <b>Q86UX7</b> | FERMT3  | 66  | Fermitin family<br>homolog 3                                                    | 13.30 | 20.04 | 1.51  | <0.0001 |
| <b>O75955</b> | FLOT1   | 8   | Flotillin-1                                                                     | 13.62 | 19.71 | 1.45  | 0.0024  |
| <b>Q5T0N5</b> | FNBP1L  | 4   | Formin-binding<br>protein 1-like                                                | 19.56 | 13.77 | -1.42 | 0.001   |
| <b>O60234</b> | GMFG    | 15  | Glia maturation<br>factor gamma                                                 | 18.56 | 14.78 | -1.26 | 0.015   |
| <b>P04792</b> | HSPB1   | 144 | Heat shock<br>protein beta-1                                                    | 17.77 | 15.57 | -1.14 | 0.0009  |
| <b>Q9BYW2</b> | SETD2   | 18  | Histone-lysine N-<br>methyltransferase                                          | 18.76 | 14.58 | -1.29 | 0.0018  |
| <b>O00291</b> | HIP1    | 24  | Huntingtin-<br>interacting<br>protein 1                                         | 9.99  | 23.34 | 2.34  | <0.0001 |
| <b>O75146</b> | HIP1R   | 4   | Huntingtin-<br>interacting<br>protein 1-related<br>protein                      | 13.06 | 20.27 | 1.55  | 0.0265  |
| <b>P05107</b> | ITGB2   | 82  | Integrin beta-2                                                                 | 11.36 | 21.97 | 1.93  | <0.0001 |
| <b>P05362</b> | ICAM1   | 17  | Intercellular<br>adhesion<br>molecule 1                                         | 1.41  | 31.93 | 22.68 | <0.0001 |
| <b>P19525</b> | EIF2AK2 | 29  | Interferon-<br>induced, double-<br>stranded RNA-<br>activated protein<br>kinase | 9.69  | 23.65 | 2.44  | <0.0001 |
| <b>Q9UI08</b> | EVL     | 26  | Isoform 1 of<br>Ena/VASP-like<br>protein                                        | 18.48 | 14.86 | -1.24 | 0.0005  |
| <b>Q9UEY8</b> | ADD3    | 8   | Isoform 1 of<br>Gamma-adducin                                                   | 20.31 | 13.02 | -1.56 | <0.0001 |
| <b>P07355</b> | ANXA2   | 42  | Isoform 2 of A                                                                  | 12.50 | 20.84 | 1.67  | <0.0001 |
| <b>Q8N556</b> | AFAP1   | 6   | Isoform 2 of Actin<br>filament-<br>associated protein<br>1                      | 13.33 | 20.00 | 1.50  | 0.0002  |
| <b>Q8NCM8</b> | DYNC2H1 | 2   | Isoform 2 of<br>Cytoplasmic<br>dynein 2 heavy<br>chain 1                        | 18.96 | 14.37 | -1.32 | 0.007   |
| <b>O95466</b> | FMNL1   | 47  | Isoform 2 of<br>Formin-like<br>protein 1                                        | 14.46 | 18.87 | 1.30  | <0.0001 |

|               |           |     |                                                                |       |       |       |         |
|---------------|-----------|-----|----------------------------------------------------------------|-------|-------|-------|---------|
| <b>P20701</b> | ITGAL     | 35  | Isoform 2 of Integrin alpha-L                                  | 14.57 | 18.76 | 1.29  | 0.0002  |
| <b>P11215</b> | ITGAM     | 13  | Isoform 2 of Integrin alpha-M                                  | 11.17 | 22.17 | 1.99  | <0.0001 |
| <b>O60711</b> | LPXN      | 11  | Isoform 2 of Leupaxin                                          | 7.50  | 25.84 | 3.45  | <0.0001 |
| <b>Q6WCQ1</b> | MPRIIP    | 10  | Isoform 2 of Myosin phosphatase Rho-interactin                 | 18.43 | 14.90 | -1.24 | 0.0012  |
| <b>Q9UJF2</b> | RASAL2    | 29  | Isoform 2 of Ras GTPase-activating pro                         | 19.05 | 14.29 | -1.33 | <0.0001 |
| <b>Q7LDG7</b> | RASGRP2   | 18  | Isoform 2 of RAS guanyl-releasing protein 2                    | 19.47 | 13.87 | -1.40 | <0.0001 |
| <b>Q96RF0</b> | SNX18     | 17  | Isoform 2 of Sorting nexin-18                                  | 19.31 | 14.02 | -1.38 | <0.0001 |
| <b>Q9UMS6</b> | SYNPO2    | 2   | Isoform 2 of Synaptopodin-2                                    | 24.15 | 9.18  | -2.63 | <0.0001 |
| <b>O00468</b> | AGRN      | 28  | Isoform 3 of Agrin                                             | 10.83 | 22.50 | 2.08  | <0.0001 |
| <b>P35611</b> | ADD1      | 19  | Isoform 3 of Alpha-adducin                                     | 18.58 | 14.75 | -1.26 | 0.0051  |
| <b>Q16643</b> | DBN1      | 20  | Isoform 3 of Drebrin                                           | 19.14 | 14.20 | -1.35 | <0.0001 |
| <b>P06396</b> | GSN       | 197 | Isoform 3 of Gelsolin                                          | 18.68 | 14.65 | -1.27 | <0.0001 |
| <b>P33241</b> | LSP1      | 2   | Isoform 3 of Lymphocyte-specific protein 1                     | 23.57 | 9.76  | -2.42 | <0.0001 |
| <b>Q13137</b> | CALCOCO 2 | 13  | Isoform 4 of Calcium-binding and coiled-coil domain-containing | 19.83 | 13.50 | -1.47 | <0.0001 |
| <b>Q8TDZ2</b> | MICAL1    | 80  | Isoform 4 of Protein-methionine sulfoxide                      | 17.98 | 15.35 | -1.17 | 0.0092  |
| <b>Q9P266</b> | KIAA1462  | 4   | Junctional protein associated with coronary artery disease     | 19.53 | 13.80 | -1.42 | 0.0249  |
| <b>Q86UP2</b> | KTN1      | 96  | Kinectin                                                       | 17.87 | 15.47 | -1.15 | 0.04    |
| <b>Q9NQ48</b> | LZTFL1    | 17  | Leucine zipper transcription                                   | 19.13 | 14.20 | -1.35 | 0.0191  |



|               |          |     |                                                                                              |       |       |       |         |
|---------------|----------|-----|----------------------------------------------------------------------------------------------|-------|-------|-------|---------|
|               |          |     | factor-like protein<br>1                                                                     |       |       |       |         |
| <b>P07333</b> | CSF1R    | 2   | Macrophage<br>colony-<br>stimulating factor<br>1 receptor                                    | 24.75 | 8.58  | -2.88 | 0.0021  |
| <b>Q9UPN3</b> | MACF1    | 152 | Microtubule-actin<br>cross-linking<br>factor 1, isoforms<br>1/2/3/5                          | 18.77 | 14.56 | -1.29 | <0.0001 |
| <b>P46821</b> | MAP1B    | 59  | Microtubule-<br>associated protein<br>1B                                                     | 11.40 | 21.93 | 1.92  | <0.0001 |
| <b>P29966</b> | MARCKS   | 10  | Myristoylated<br>alanine-rich C-<br>kinase substrate                                         | 14.83 | 18.50 | 1.25  | <0.0001 |
| <b>O14745</b> | SLC9A3R1 | 17  | Na(+)/H(+)<br>exchange<br>regulatory<br>cofactor NHE-RF1                                     | 19.59 | 13.74 | -1.43 | <0.0001 |
| <b>Q8NF91</b> | SYNE1    | 2   | Nesprin-1                                                                                    | 20.15 | 13.18 | -1.53 | 0.0009  |
| <b>Q09666</b> | AHNAK    | 420 | Neuroblast<br>differentiation-<br>associated protein                                         | 15.46 | 17.87 | 1.16  | 0.0374  |
| <b>P61601</b> | NCALD    | 21  | Neurocalcin-delta                                                                            | 19.10 | 14.23 | -1.34 | <0.0001 |
| <b>Q04721</b> | NOTCH2   | 18  | Neurogenic locus<br>notch homolog<br>protein 2                                               | 15.30 | 18.04 | 1.18  | 0.0178  |
| <b>Q0ZGT2</b> | NEXN     | 2   | Nexilin                                                                                      | 13.71 | 19.62 | 1.43  | 0.0111  |
| <b>Q14980</b> | NUMA1    | 142 | Nuclear mitotic<br>apparatus protein<br>1                                                    | 18.02 | 15.31 | -1.18 | 0.001   |
| <b>Q96RD7</b> | PANX1    | 3   | Pannexin-1                                                                                   | 12.65 | 20.68 | 1.63  | <0.0001 |
| <b>O75781</b> | PALM     | 8   | Paralemmmin-1                                                                                | 19.15 | 14.19 | -1.35 | 0.0005  |
| <b>Q8TCU6</b> | PREX1    | 55  | Phosphatidylinosi<br>tol 3,4,5-<br>trisphosphate-<br>dependent Rac<br>exchanger 1<br>protein | 19.33 | 14.00 | -1.38 | <0.0001 |
| <b>Q6NYC8</b> | PPP1R18  | 14  | Phostensin                                                                                   | 14.48 | 18.85 | 1.30  | 0.0008  |
| <b>Q15149</b> | PLEC     | 239 | Plectin                                                                                      | 13.84 | 19.49 | 1.41  | <0.0001 |
| <b>Q8N8S7</b> | ENAH     | 2   | Protein enabled<br>homolog                                                                   | 13.58 | 19.75 | 1.45  | 0.0139  |
| <b>Q96ED9</b> | HOOK2    | 2   | Protein Hook<br>homolog 2                                                                    | 20.39 | 12.94 | -1.58 | 0.0002  |

|               |              |    |                                                                       |       |       |       |         |
|---------------|--------------|----|-----------------------------------------------------------------------|-------|-------|-------|---------|
| <b>Q05655</b> | PRKCD        | 57 | Protein kinase C<br>delta type                                        | 14.64 | 18.69 | 1.28  | 0.0001  |
| <b>Q8TE77</b> | SSH3         | 24 | Protein<br>phosphatase<br>Slingshot<br>homolog 3                      | 19.81 | 13.52 | -1.46 | <0.0001 |
| <b>P26447</b> | S100A4       | 23 | Protein S100-A4                                                       | 18.26 | 15.07 | -1.21 | 0.0279  |
| <b>P25815</b> | S100P        | 4  | Protein S100-P                                                        | 8.99  | 24.35 | 2.71  | <0.0001 |
| <b>O75695</b> | RP2          | 19 | Protein X                                                             | 18.05 | 15.29 | -1.18 | <0.0001 |
| <b>O15553</b> | MEFV         | 5  | Pyrin                                                                 | 13.54 | 19.79 | 1.46  | 0.0044  |
| <b>Q96QF0</b> | RAB3IP       | 3  | Rab-3A-<br>interacting<br>protein                                     | 13.61 | 19.73 | 1.45  | 0.0093  |
| <b>O15211</b> | RGL2         | 15 | Ral guanine<br>nucleotide<br>dissociation<br>stimulator-like 2        | 18.78 | 14.56 | -1.29 | 0.0015  |
| <b>Q9H6Z4</b> | RANBP3       | 16 | Ran-binding<br>protein 3                                              | 18.66 | 14.68 | -1.27 | 0.0063  |
| <b>O14807</b> | MRAS         | 3  | Ras-related<br>protein M-Ras                                          | 12.66 | 20.67 | 1.63  | 0.0059  |
| <b>Q92930</b> | RAB8B        | 6  | Ras-related<br>protein Rab-8B                                         | 13.81 | 19.53 | 1.41  | 0.0092  |
| <b>Q86X27</b> | RALGPS2      | 3  | Ras-specific<br>guanine<br>nucleotide-<br>releasing factor<br>RalGPS2 | 19.63 | 13.70 | -1.43 | 0.0161  |
| <b>Q53QZ3</b> | ARHGAP1<br>5 | 18 | Rho GTPase-<br>activating protein<br>15                               | 18.79 | 14.55 | -1.29 | 0.0012  |
| <b>Q68EM7</b> | ARHGAP1<br>7 | 23 | Rho GTPase-<br>activating protein<br>17                               | 19.28 | 14.05 | -1.37 | 0.0234  |
| <b>Q969X0</b> | RILPL2       | 7  | RILP-like protein<br>2                                                | 13.08 | 20.26 | 1.55  | 0.0048  |
| <b>Q9GZR1</b> | SEN6         | 10 | Sentrin-specific<br>protease 6                                        | 19.62 | 13.71 | -1.43 | <0.0001 |
| <b>Q96GX5</b> | MASTL        | 12 | Serine/threonine-<br>protein kinase<br>greatwall                      | 13.87 | 19.46 | 1.40  | <0.0001 |
| <b>Q8TDX7</b> | NEK7         | 13 | Serine/threonine-<br>protein kinase<br>Nek7                           | 18.48 | 14.85 | -1.24 | 0.0017  |
| <b>P02787</b> | TF           | 2  | Serotransferrin                                                       | 15.52 | 17.81 | 1.15  | <0.0001 |
| <b>P16949</b> | STMN1        | 49 | Stathmin                                                              | 18.94 | 14.40 | -1.32 | <0.0001 |

|               |         |    |                                                                              |       |       |       |         |
|---------------|---------|----|------------------------------------------------------------------------------|-------|-------|-------|---------|
| <b>Q9UQE7</b> | SMC3    | 98 | Structural<br>maintenance of<br>chromosomes<br>protein 3                     | 17.90 | 15.44 | -1.16 | 0.0274  |
| <b>Q9UH65</b> | SWAP70  | 46 | Switch-associated<br>protein 70                                              | 18.58 | 14.75 | -1.26 | 0.0003  |
| <b>Q8N3V7</b> | SYNPO   | 2  | Synaptopodin                                                                 | 20.44 | 12.89 | -1.59 | <0.0001 |
| <b>O00560</b> | SDCBP   | 22 | Syntenin-1                                                                   | 15.33 | 18.00 | 1.17  | 0.0241  |
| <b>P36897</b> | TGFBR1  | 5  | TGF-beta receptor<br>type-1                                                  | 12.43 | 20.90 | 1.68  | 0.0005  |
| <b>O94759</b> | TRPM2   | 3  | Transient receptor<br>potential cation<br>channel<br>subfamily M<br>member 2 | 12.33 | 21.00 | 1.70  | <0.0001 |
| <b>Q9NZR1</b> | TMOD2   | 7  | Tropomodulin-2                                                               | 13.46 | 19.88 | 1.48  | 0.0007  |
| <b>P67936</b> | TPM4    | 26 | Tropomyosin<br>alpha-4 chain                                                 | 13.16 | 20.17 | 1.53  | <0.0001 |
| <b>P23381</b> | WARS    | 56 | Tryptophan--<br>tRNA ligase,<br>cytoplasmic                                  | 15.53 | 17.81 | 1.15  | 0.0109  |
| <b>Q15814</b> | TBCC    | 21 | Tubulin-specific<br>chaperone C                                              | 18.42 | 14.91 | -1.24 | 0.0092  |
| <b>P21580</b> | TNFAIP3 | 17 | Tumor necrosis<br>factor alpha-<br>induced protein 3                         | 9.47  | 23.87 | 2.52  | <0.0001 |
| <b>P08631</b> | HCK     | 26 | Tyrosine-protein<br>kinase                                                   | 13.19 | 20.14 | 1.53  | <0.0001 |
| <b>Q9NQC7</b> | CYLD    | 18 | Ubiquitin<br>carboxyl-terminal<br>hydrolase                                  | 13.98 | 19.36 | 1.38  | 0.0003  |
| <b>B0I1T2</b> | MYO1G   | 51 | Unconventional<br>myosin-Ig                                                  | 14.26 | 19.08 | 1.34  | 0.0054  |
| <b>Q92614</b> | MYO18A  | 72 | Unconventional<br>myosin-XVIIIa                                              | 18.74 | 14.59 | -1.28 | <0.0001 |
| <b>Q03405</b> | PLAUR   | 9  | Urokinase<br>plasminogen<br>activator surface<br>receptor                    | 11.02 | 22.31 | 2.03  | <0.0001 |
| <b>P08670</b> | VIM     | 58 | Vimentin                                                                     | 8.95  | 24.38 | 2.72  | <0.0001 |
| <b>P04004</b> | VTN     | 6  | Vitronectin                                                                  | 11.67 | 21.66 | 1.86  | <0.0001 |

**Table S2.** Differentially expressed UPR proteins identified in PSP treated THP1-Blue-CD14 cells.

| Accession #   | GENE     | Quantified Spectra Counts | Protein Name                                                     | Average Expression in Control | Average Expression in PSP | Fold Change | Adjusted P Value |
|---------------|----------|---------------------------|------------------------------------------------------------------|-------------------------------|---------------------------|-------------|------------------|
| <b>O60613</b> | SELENOH  | 10                        | 15 kDa selenoprotein H                                           | 19.43                         | 13.90                     | -1.40       | <0.0001          |
| <b>P05067</b> | APP      | 23                        | Amyloid beta A4 protein                                          | 14.05                         | 19.28                     | 1.37        | <0.0001          |
| <b>P32929</b> | CTH      | 13                        | Cystathionine gamma-lyase                                        | 13.00                         | 20.33                     | 1.56        | <0.0001          |
| <b>Q9H3Z4</b> | DNAJC5   | 7                         | DnaJ homolog subfamily C member 5                                | 17.90                         | 15.44                     | -1.16       | 0.0287           |
| <b>Q92611</b> | EDEM1    | 19                        | ER degradation-enhancing alpha-mannosidase-like protein 1        | 14.82                         | 18.52                     | 1.25        | 0.0278           |
| <b>Q9NRD1</b> | FBXO6    | 4                         | F-box only protein 6                                             | 12.31                         | 21.03                     | 1.71        | <0.0001          |
| <b>Q06210</b> | GFPT1    | 62                        | Glutamine--fructose-6-phosphate aminotransferase [isomerizing] 1 | 14.87                         | 18.47                     | 1.24        | 0.0084           |
| <b>Q9HAV7</b> | GRPEL1   | 13                        | GrpE protein homolog 1, mitochondrial                            | 14.22                         | 19.11                     | 1.34        | 0.0003           |
| <b>Q92598</b> | HSPH1    | 82                        | Heat shock protein 105 kDa                                       | 14.40                         | 18.93                     | 1.31        | <0.0001          |
| <b>P08238</b> | HSP90AB1 | 272                       | Heat shock protein HSP 90-beta                                   | 15.44                         | 17.89                     | 1.16        | 0.0299           |
| <b>Q9Y4L1</b> | HYOU1    | 120                       | Hypoxia up-regulated protein 1                                   | 14.79                         | 18.55                     | 1.25        | <0.0001          |
| <b>Q96HD1</b> | CRELD1   | 9                         | Isoform 2 of Cysteine-rich with EGF-like domain protein 1        | 14.14                         | 19.20                     | 1.36        | 0.0373           |
| <b>P04233</b> | CD74     | 14                        | Isoform 2 of HLA class II                                        | 12.98                         | 20.35                     | 1.57        | <0.0001          |

|               |           |     |                                                                                    |       |       |       |         |
|---------------|-----------|-----|------------------------------------------------------------------------------------|-------|-------|-------|---------|
|               |           |     | histocompatibility<br>antigen ga                                                   |       |       |       |         |
| <b>Q5F1R6</b> | DNAJC21   | 2   | Isoform 3 of DnaJ<br>homolog<br>subfamily C<br>member 21                           | 19.58 | 13.75 | -1.42 | <0.0001 |
| <b>Q14145</b> | KEAP1     | 10  | Kelch-like ECH-<br>associated<br>protein 1                                         | 19.78 | 13.55 | -1.46 | <0.0001 |
| <b>Q13451</b> | FKBP5     | 39  | Peptidyl-prolyl<br>cis-trans<br>isomerase                                          | 14.00 | 19.33 | 1.38  | <0.0001 |
| <b>O00459</b> | PIK3R2    | 15  | Phosphatidylinosi<br>tol 3-kinase<br>regulatory<br>subunit beta                    | 18.77 | 14.57 | -1.29 | 0.0015  |
| <b>P02545</b> | LMNA      | 111 | Prelamin-A/C                                                                       | 14.46 | 18.88 | 1.31  | <0.0001 |
| <b>P07237</b> | P4HB      | 259 | Protein disulfide-<br>isomerase                                                    | 15.35 | 17.99 | 1.17  | 0.0086  |
| <b>Q9BZQ8</b> | FAM129A   | 44  | Protein Niban                                                                      | 14.18 | 19.16 | 1.35  | <0.0001 |
| <b>Q58FG1</b> | HSP90AA4P | 2   | Putative heat<br>shock protein HSP<br>90-alpha A4                                  | 18.42 | 14.92 | -1.23 | 0.0244  |
| <b>O75460</b> | ERN1      | 5   | Serine/threonine-<br>protein<br>kinase/endoribon<br>uclease IRE1                   | 13.86 | 19.47 | 1.41  | 0.0359  |
| <b>Q96EQ0</b> | SGTB      | 6   | Small glutamine-<br>rich<br>tetratricopeptide<br>repeat-containing<br>protein beta | 12.71 | 20.63 | 1.62  | 0.0012  |
| <b>P38646</b> | HSPA9     | 225 | Stress-70 protein,<br>mitochondrial                                                | 15.13 | 18.20 | 1.20  | 0.0004  |
| <b>Q8NBS9</b> | TXNDC5    | 26  | Thioredoxin<br>domain-<br>containing<br>protein 5                                  | 15.59 | 17.74 | 1.14  | 0.0017  |
| <b>O14657</b> | TOR1B     | 8   | Torsin-1B                                                                          | 12.03 | 21.30 | 1.77  | <0.0001 |

|               |        |   |                                            |       |       |       |        |
|---------------|--------|---|--------------------------------------------|-------|-------|-------|--------|
| <b>Q9NS93</b> | TM7SF3 | 3 | Transmembrane<br>7 superfamily<br>member 3 | 19.55 | 12.83 | -1.52 | 0.0099 |
| <b>Q96RU7</b> | TRIB3  | 5 | Tribbles homolog<br>3                      | 13.75 | 19.59 | 1.43  | 0.0015 |
